# Supplementary material for: Constitutive Vagus Nerve Activation Modulates Immune Suppression in Sepsis Survivors
Source: PubMed Central journal article supplement (PMC6135874; doi:10.3389/fimmu.2018.02032), 2018-09-06
Supplement: Data_Sheet_1.pdf [file Data_Sheet_1.pdf]

1 *Supplemental Material*

2 **Constitutive vagus nerve activation modulates immune suppression**  
3 **in sepsis survivors**

4 Minakshi Rana<sup>1#</sup>, Yurong Fei-Bloom<sup>1#</sup>, Myoungsun Son<sup>1#</sup>, Andrea La Bella<sup>1</sup>, Mahendar  
5 Ochani<sup>2</sup>, Yaakov A. Levine<sup>3,4</sup>, Pui Yan Chiu<sup>2</sup>, Ping Wang<sup>2</sup>, Sangeeta S. Chavan<sup>4</sup>, Bruce T.  
6 Volpe<sup>4</sup>, Barbara Sherry<sup>2\*</sup>, Betty Diamond<sup>1\*</sup>

7 <sup>1</sup>Center for Autoimmune, Musculoskeletal and Hematopoietic Diseases, The Feinstein Institute  
8 for Medical Research, Manhasset, NY, United States; <sup>2</sup>Center for Immunology and  
9 Inflammation, The Feinstein Institute for Medical Research, Manhasset, NY, United States;  
10 <sup>3</sup>SetPoint Medical Corporation, Valencia, California, United States; and <sup>4</sup>Center for Biomedical  
11 Science, The Feinstein Institute for Medical Research, Manhasset, NY, United States.

12 **\*Correspondence**

13 Betty Diamond, The Feinstein Institute for Medical Research, Center for Autoimmune,  
14 Musculoskeletal and Hematopoietic Diseases, 350 Community Dr, Manhasset, New York 11030;  
15 e-mail: bdiamond@northwell.edu; Phone: 516-562-3830, Fax: 516-562-2953

16 Barbara Sherry, The Feinstein Institute for Medical Research, Center for Immunology and  
17 Inflammation, 350 Community Dr, Manhasset, New York 11030; e-mail:  
18 bsherry@northwell.edu; Phone: 516-562-3402, Fax: 516-562-1022

19 <sup>#</sup>MR, <sup>#</sup>YF-B, and <sup>#</sup>MS contributed equally to this study.

25 **Supplementary Figures and Figure Legends:**

26

*Ex Vivo*

27

28

29

30

31

32

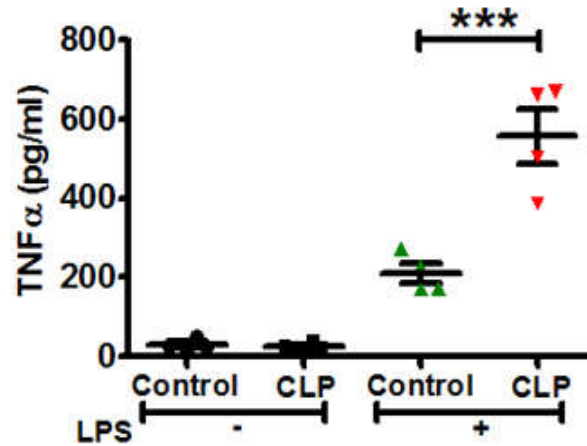

33 **Supplementary Figure 1. Splenocytes from CLP-survivors show enhanced TNF $\alpha$**   
34 **expression *ex vivo*.** Splenocytes were isolated from control and CLP-surviving mice at 4 weeks  
35 after surgery and cultured for 24 hr with or without LPS (100 ng/ mL). Each data point  
36 represents the average of duplicate wells from a single mouse. TNF $\alpha$  in the culture supernatants  
37 was measured by ELISA (R&D). Values represent mean  $\pm$  SEM (n=4 mice/group) from one of  
38 two independent experiments; Control+LPS vs. CLP+LPS \*\*\*p < 0.001 (Tukey's post hoc test).

39

40

41

42

43

44

45

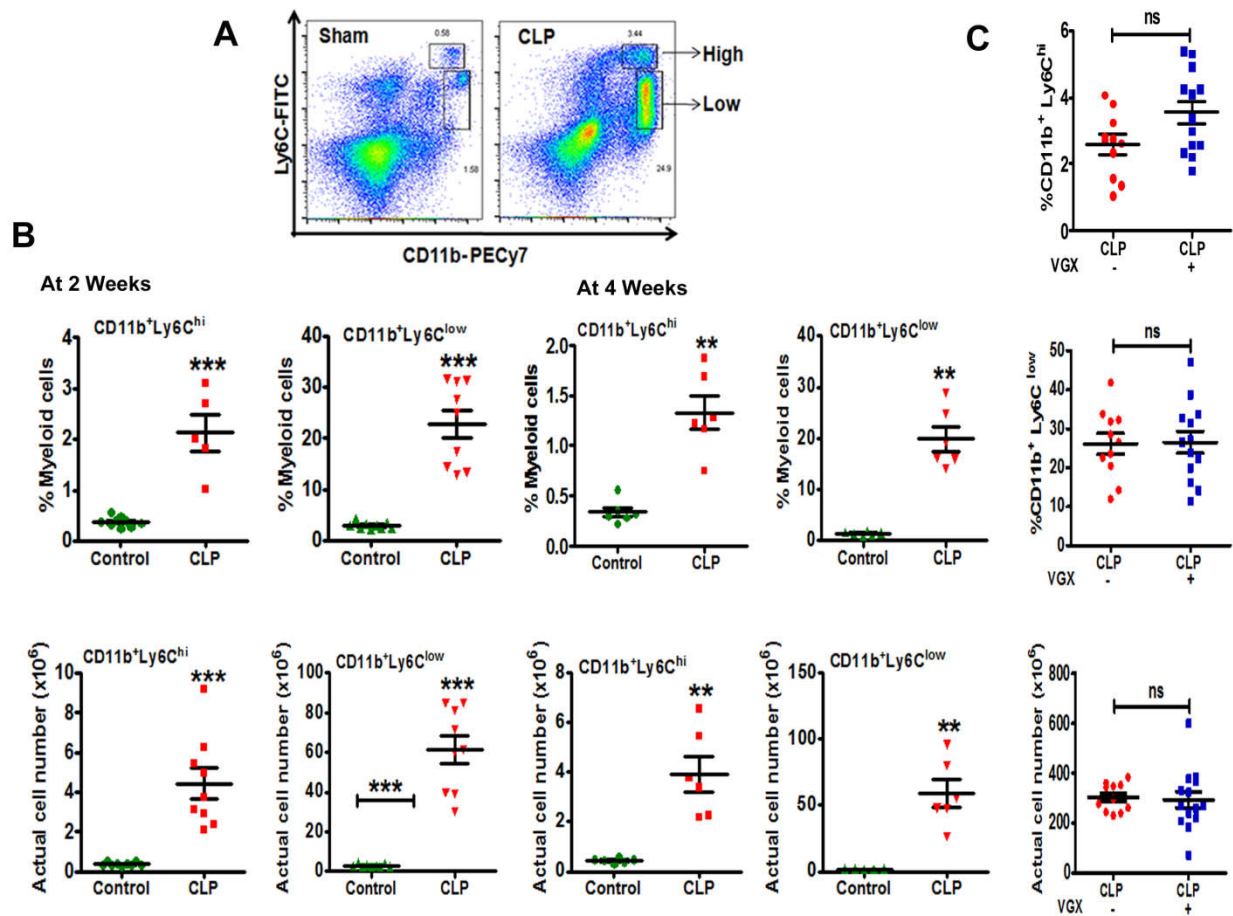

46

47 **Supplementary Figure 2. CLP mice exhibit sustained expansion of the CD11b<sup>+</sup> Ly6C**  
 48 **myeloid population in the spleen that was not altered by vagotomy.** (A) Representative  
 49 gating for CD11b<sup>+</sup> Ly6C<sup>high</sup> and CD11b<sup>+</sup> Ly6C<sup>low</sup> myeloid cells in control and CLP mice (4  
 50 weeks). (B) Percentage and numbers of CD11b<sup>+</sup> Ly6C<sup>high</sup> and CD11b<sup>+</sup> Ly6C<sup>low</sup> myeloid cells per  
 51 spleen in control or CLP-surviving mice at 2 and 4 weeks post-surgery. (C) Vagotomy (VGX)  
 52 did not alter the percentages of CD11b<sup>+</sup> Ly6C<sup>high</sup> and CD11b<sup>+</sup> Ly6C<sup>low</sup> myeloid cells and the  
 53 actual number of total spleen cells in CLP-survivors. Values represent mean ± SEM (n=5-14  
 54 mice/group). Control vs. CLP \*\*p < 0.01; \*\*\*p < 0.001 and CLP VGX<sup>-</sup> vs. CLP VGX<sup>+</sup> ns=not  
 55 significant (Mann-Whitney U test).

56

57

58

59

60

61

62

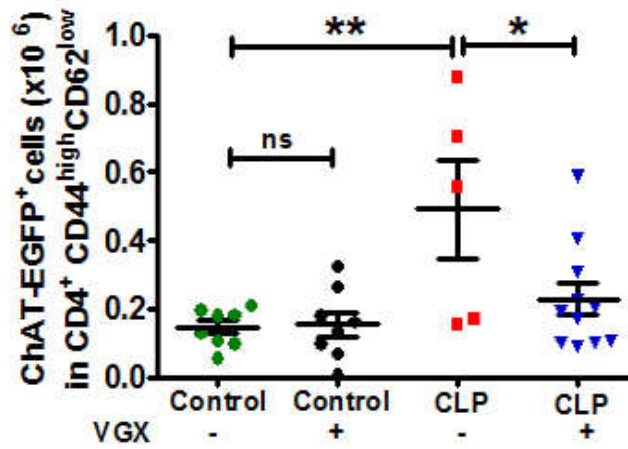

63

64 **Supplementary Figure 3. Memory ChAT<sup>+</sup> T cells numbers in ChAT-EGFP mice.** The  
65 memory ChAT<sup>+</sup> T cells in control and CLP-surviving ChAT-EGFP mice with and without  
66 vagotomy after 4 weeks surgery. Values represent mean  $\pm$  SEM (n=5-11 mice/group). Control  
67 VGX<sup>-</sup> vs. CLP VGX<sup>-</sup> \*\*p < 0.01; or CLP VGX<sup>-</sup> vs. CLP VGX<sup>+</sup> \*p < 0.05; Control VGX<sup>-</sup> vs.  
68 Control VGX<sup>+</sup> ns=not significant (Tukey's post hoc one-way ANOVA).

69

70

71

72

73

74
